# Supplementary material for: Deletion of cyclooxygenase-2 inhibits K-ras–induced lung carcinogenesis
Source: PubMed Central journal article supplement (PMC4770739; doi:10.18632/oncotarget.5558), 2015-10-03
Supplement: oncotarget-06-38816-s001.pdf [file oncotarget-06-38816-s001.pdf]

SUPPLEMENTARY FIGURES

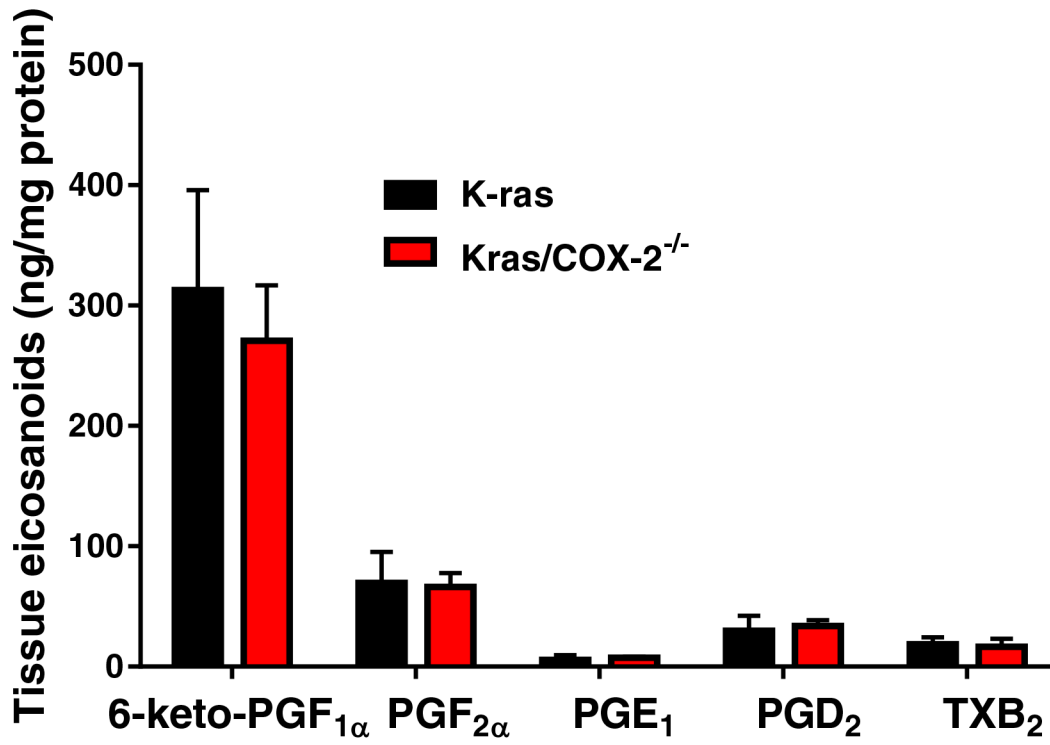

Supplementary Figure S1: Other eicosanoids in tissue from K-ras/COX-2<sup>-/-</sup> mice and K-ras<sup>-/-</sup> mice.

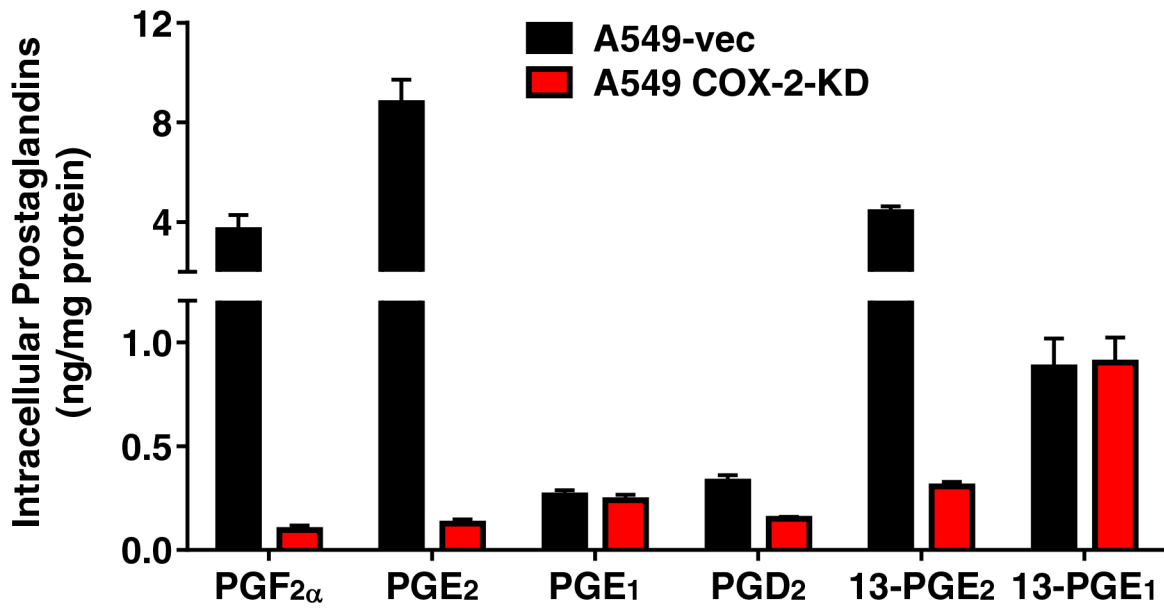

Supplementary Figure S2: Other eicosanoids in A549 cells with and without COX-2 knockdown (KD).
